# Supplementary material for: Novel heteroleptic copper(i) complexes merging the chelating 1,2-bis-diphenyldiphosphine and various L^X type coligands
Source: Royal Society of Chemistry journal article supplement (doi:10.1039/d3nj05212e), 2024-01-01
Supplement: d3nj05212e1.pdf [file d3nj05212e1.pdf]

## Electronic Supporting information

### Novel heteroleptic copper(I) complexes merging the chelating 1,2-bis-diphenyldiphosphine and various L<sup>X</sup> type coligands

J. Moussa,\* and G. Gontard

**X-Ray crystal structure determination.** Single crystals were selected, mounted and transferred into a cold nitrogen gas stream. Intensity data was collected with a Bruker Kappa-APEX2 system using micro-source Cu-K $\alpha$  radiation. Unit-cell parameters determination, data collection strategy, integration and absorption correction were carried out with the Bruker APEX2 suite of programs. The structures were solved with SIR92<sup>C1</sup> (**2**) or SIR97<sup>C1</sup> (**2**) and refined anisotropically by full-matrix least-squares methods with SHELXL<sup>C2</sup> using WinGX.<sup>C3</sup> Absolute structure for (**2**) was determined by anomalous scattering effects analysis.<sup>C4</sup> Both structures were deposited at the Cambridge Crystallographic Data Centre with numbers CCDC 1942668 and 1943248. These can be obtained free of charge via [www.ccdc.cam.ac.uk](http://www.ccdc.cam.ac.uk).

**Crystal data for 2.** C<sub>40</sub>H<sub>32</sub>CuNOP<sub>2</sub>, orthorhombic P m n 2<sub>1</sub>, a = 17.3563(2) Å, b = 11.8638(2) Å, c = 8.1509(1) Å,  $\alpha = \beta = \gamma = 90^\circ$ , V = 1678.37(4) Å<sup>3</sup>, Z = 2, yellow needle 0.9 x 0.15 x 0.02 mm,  $\mu = 2.064 \text{ mm}^{-1}$ , min / max transmission = 0.43 / 1.00, T = 200(1) K,  $\lambda = 1.54178 \text{ Å}$ ,  $\theta$  range = 3.73° to 66.56°, 10246 reflections measured, 2286 independent, R<sub>int</sub> = 0.0295, completeness = 0.991, 224 parameters, 1 restraint, Flack x = -0.00(2), final R indices R1 [ $I > 2\sigma(I)$ ] = 0.0232 and wR2 (all data) = 0.0632, GOF on F<sup>2</sup> = 1.046, largest difference peak / hole = 0.20 / -0.20 e.Å<sup>-3</sup>.

**Crystal data for 3.** C<sub>37</sub>H<sub>30</sub>CuNO<sub>2</sub>P<sub>2</sub>, monoclinic P 2<sub>1</sub>/n, a = 8.3072(2) Å, b = 18.5057(4) Å, c = 19.9706(4) Å,  $\alpha = \gamma = 90^\circ$ ,  $\beta = 94.867(1)^\circ$ , V = 3059.02(12) Å<sup>3</sup>, Z = 4, colourless needle 0.15 x 0.03 x 0.02 mm,  $\mu = 2.270 \text{ mm}^{-1}$ , min / max transmission = 0.68 / 0.75, T = 200(1) K,  $\lambda = 1.54178 \text{ Å}$ ,  $\theta$  range = 3.27° to 68.52°, 26598 reflections measured, 5504 independent, R<sub>int</sub> = 0.0318, completeness = 0.980, 389 parameters, 0 restraints, final R indices R1 [ $I > 2\sigma(I)$ ] = 0.0299 and wR2 (all data) = 0.0767, GOF on F<sup>2</sup> = 1.020, largest difference peak / hole = 0.29 / -0.30 e.Å<sup>-3</sup>.

C1- A. Altomare, G. Cascarano, C. Giacovazzo, A. Guagliardi, *J. Appl. Cryst.* **1993**, 26, 343-350.

C2- G. M. Sheldrick, *Acta Cryst. C* **2015**, 71, 3-8.

C3- L.J. Farrugia, *J. Appl. Cryst.* **2012**, 45, 849–854.

C4- H. D. Flack and G. Bernardinelli, *J. Appl. Cryst.* **2000**, 33, 1143-1148.

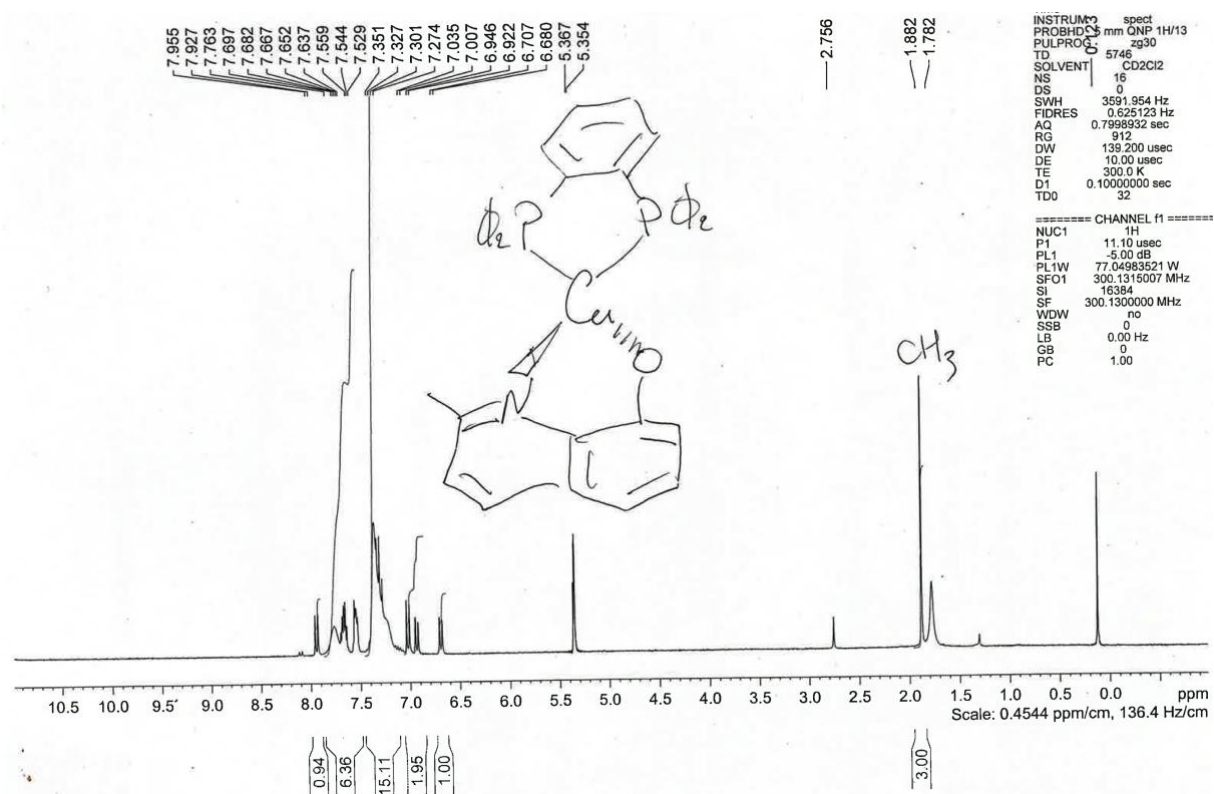

Figure S1:  $^1\text{H}$ -NMR spectrum of compound  $[\text{Cu}(\text{Me-Q})(\text{dppb})]$  (**2**) in  $\text{CD}_2\text{Cl}_2$

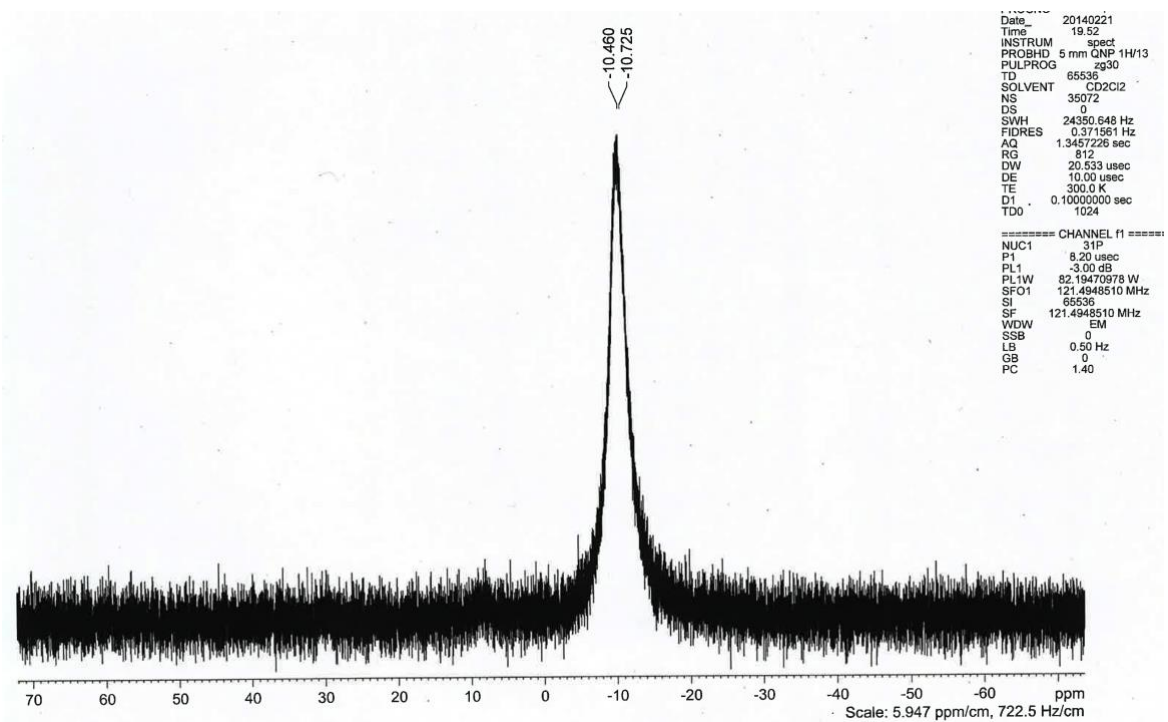

Figure S2:  $^{31}\text{P}$ -NMR spectrum of compound  $[\text{Cu}(\text{Me-Q})(\text{dppb})]$  (**2**) in  $\text{CD}_2\text{Cl}_2$

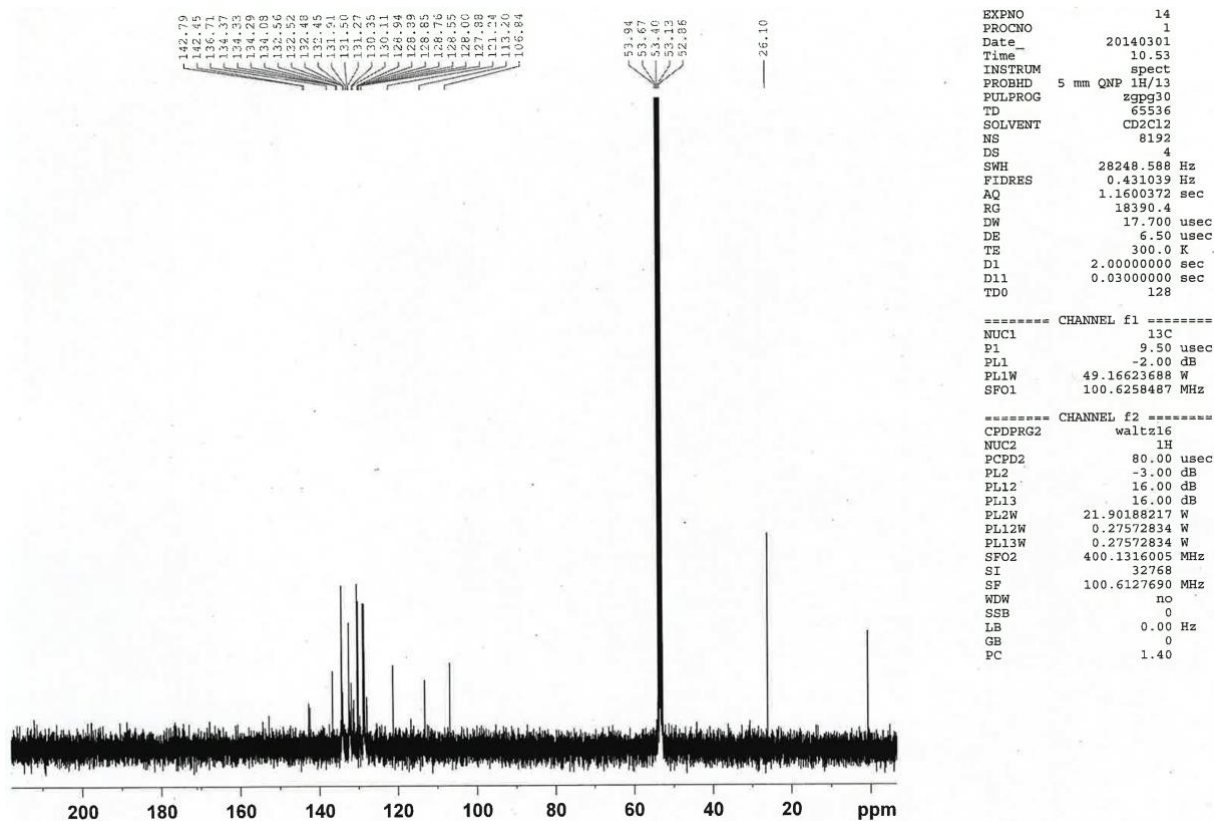

Figure S3:  $^{13}\text{C}$ -NMR spectrum of compound  $[\text{Cu}(\text{Me-Q})(\text{dppb})]$  (**2**) in  $\text{CD}_2\text{Cl}_2$

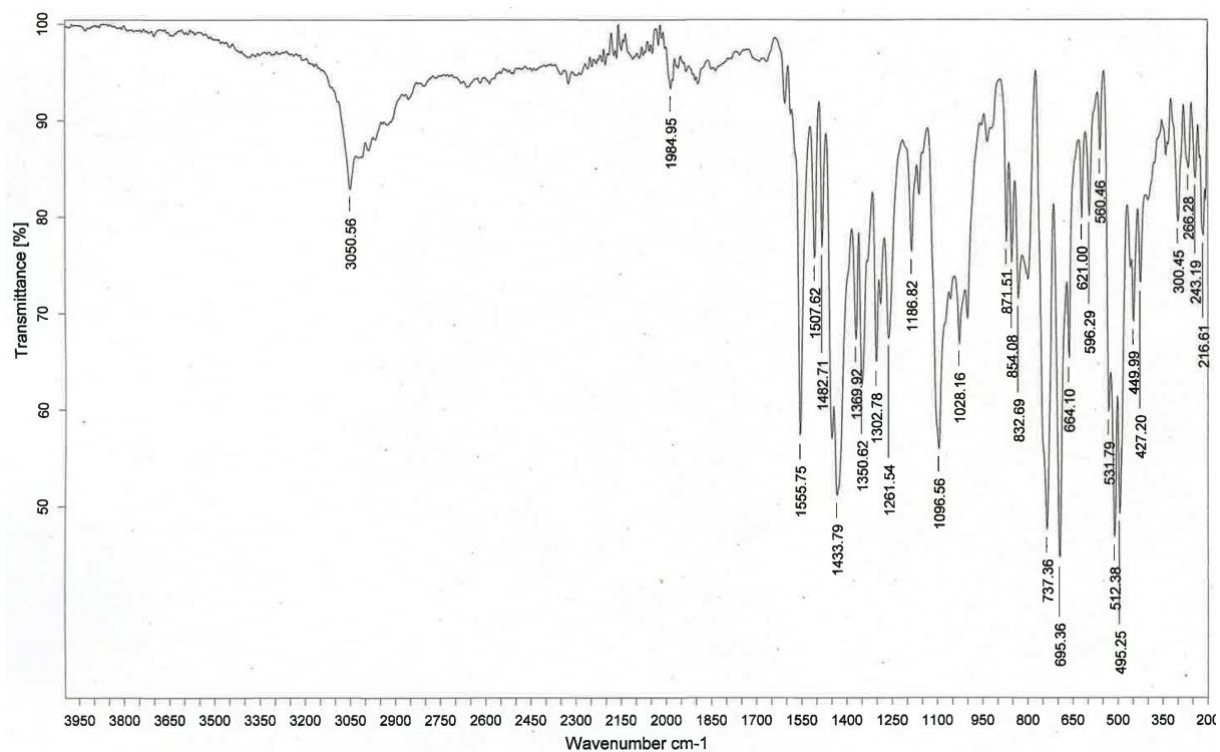

Figure S4: ATR-Infrared spectrum of compound  $[\text{Cu}(\text{Me-Q})(\text{dppb})]$  (**2**)

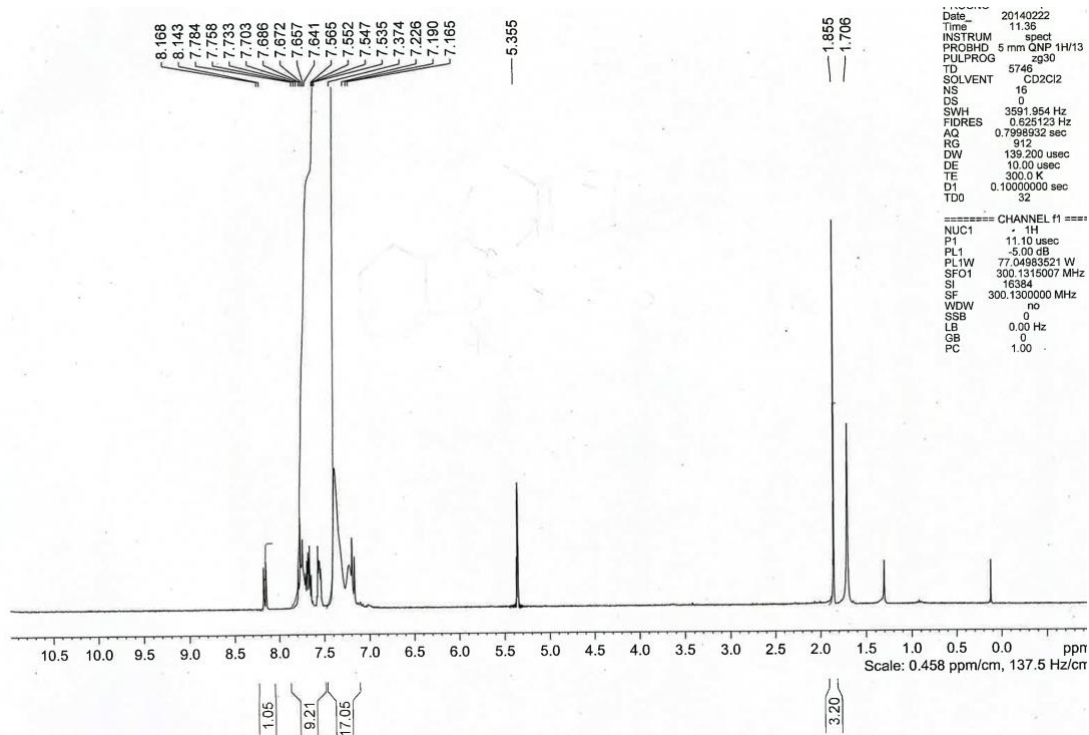

Figure S5:  $^1\text{H}$ -NMR spectrum of compound [Cu(Me-Pic)(dppb)] (**3**) in  $\text{CD}_2\text{Cl}_2$

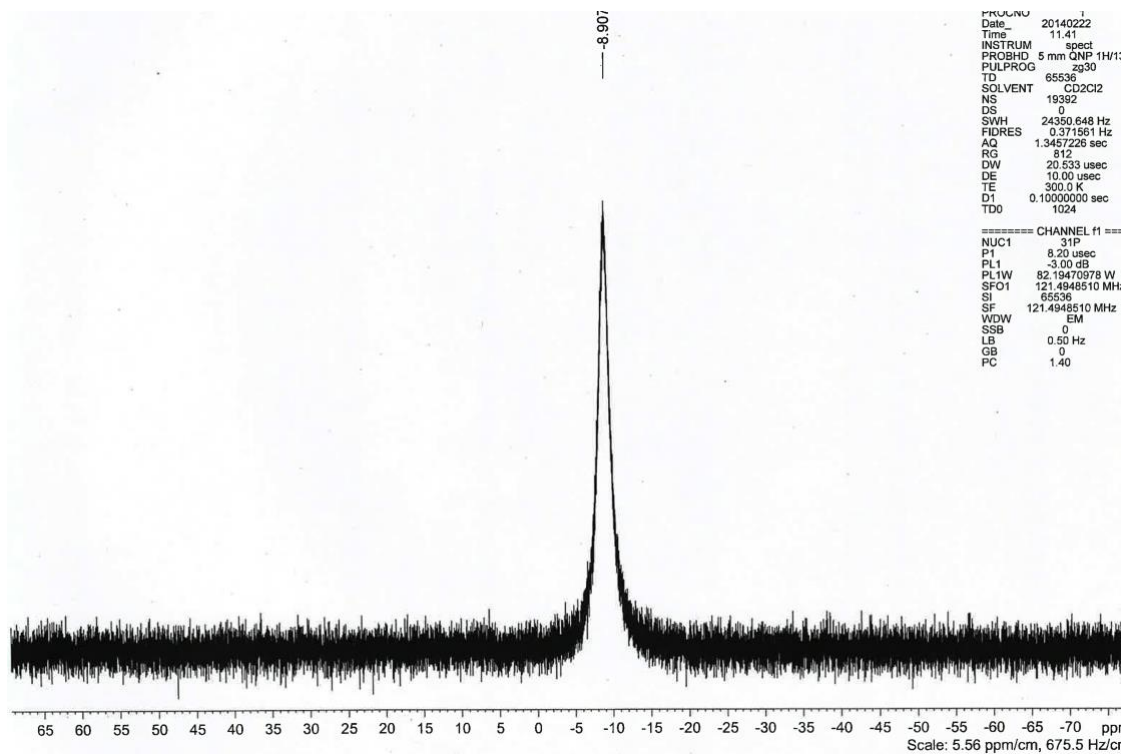

Figure S6:  $^{31}\text{P}$ -NMR spectrum of compound [Cu(Me-Pic)(dppb)] (**3**) in  $\text{CD}_2\text{Cl}_2$

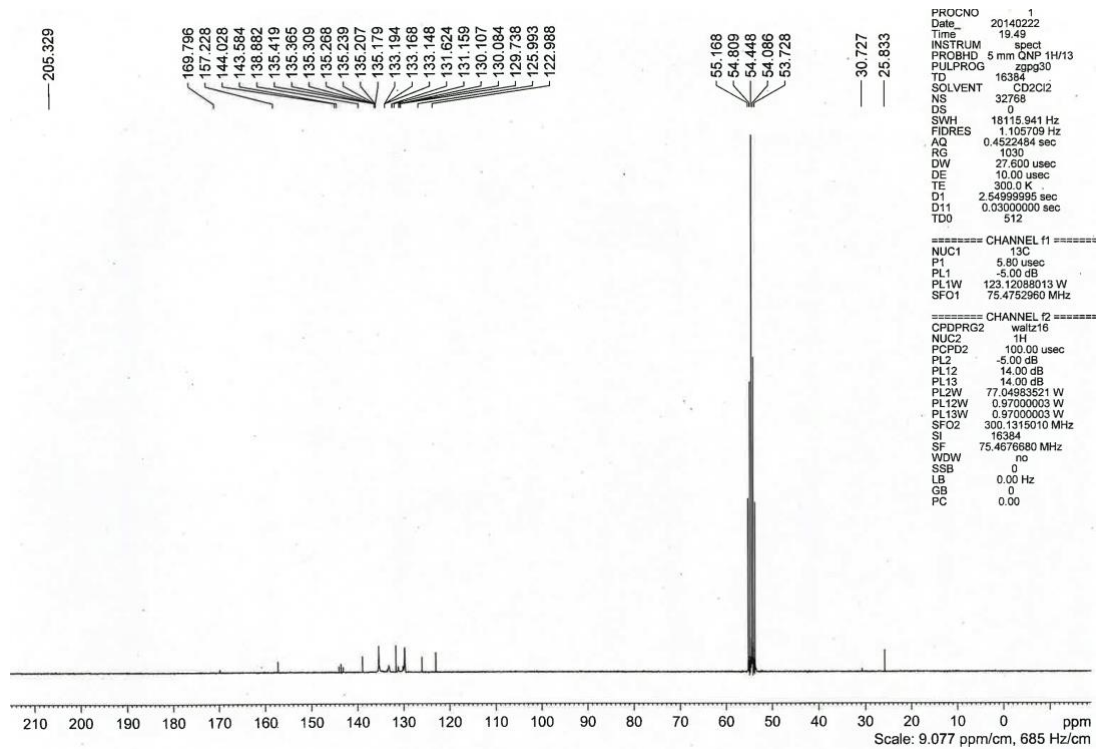

Figure S7:  $^{13}\text{C}$ -NMR spectrum of compound  $[\text{Cu}(\text{Me-Pic})(\text{dppb})]$  (**3**) in  $\text{CD}_2\text{Cl}_2$

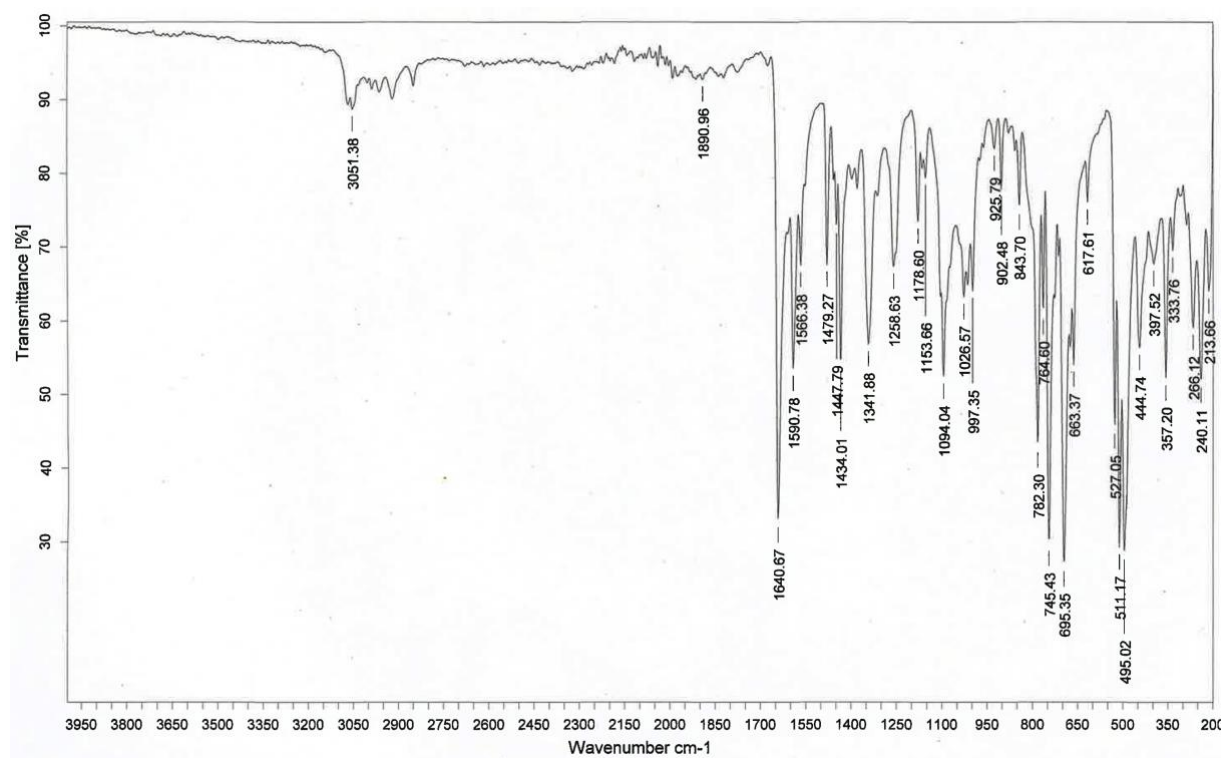

Figure S8: ATR-Infrared spectrum of compound  $[\text{Cu}(\text{Me-Pic})(\text{dppb})]$  (**3**)

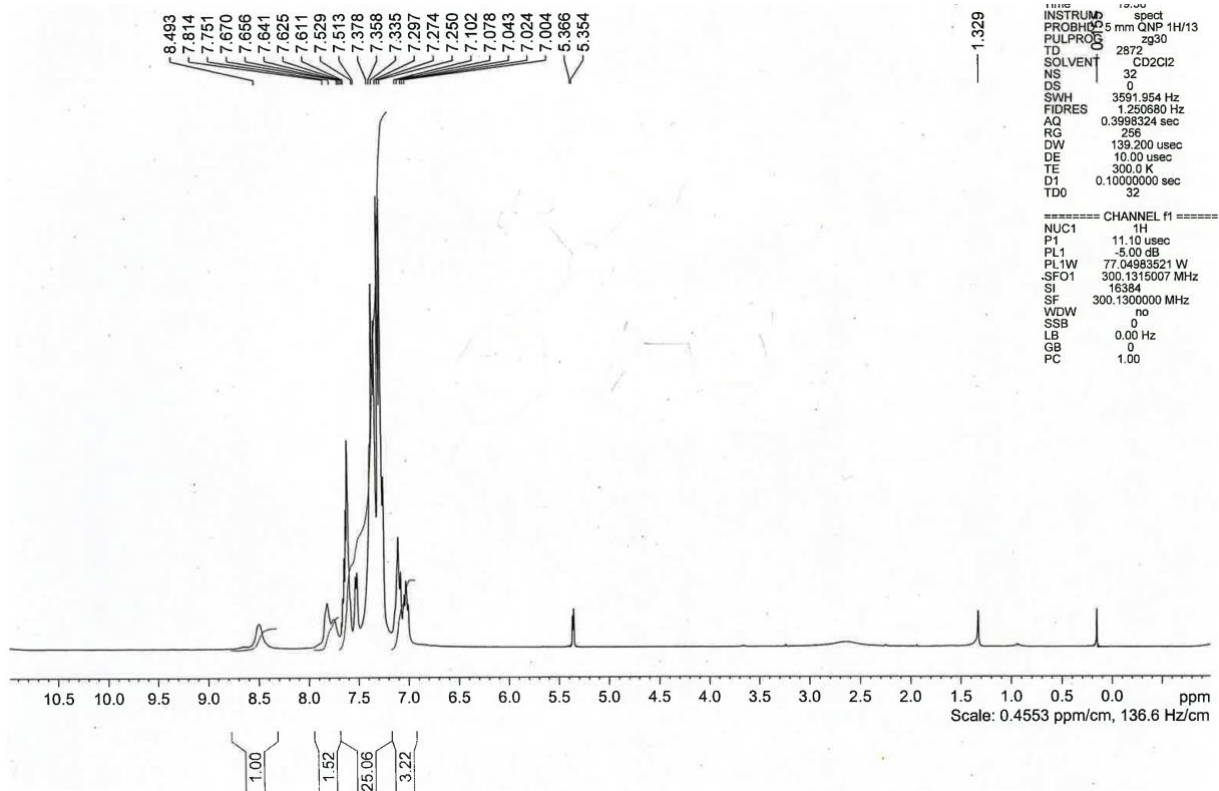

Figure S9:  $^1\text{H}$ -NMR spectrum of compound  $[\text{Cu}(\text{pbim})(\text{dppb})]$  (**4**) in  $\text{CD}_2\text{Cl}_2$

JMY-14-4 dans  $\text{CD}_2\text{Cl}_2$ , 300MHz 22/02/2014

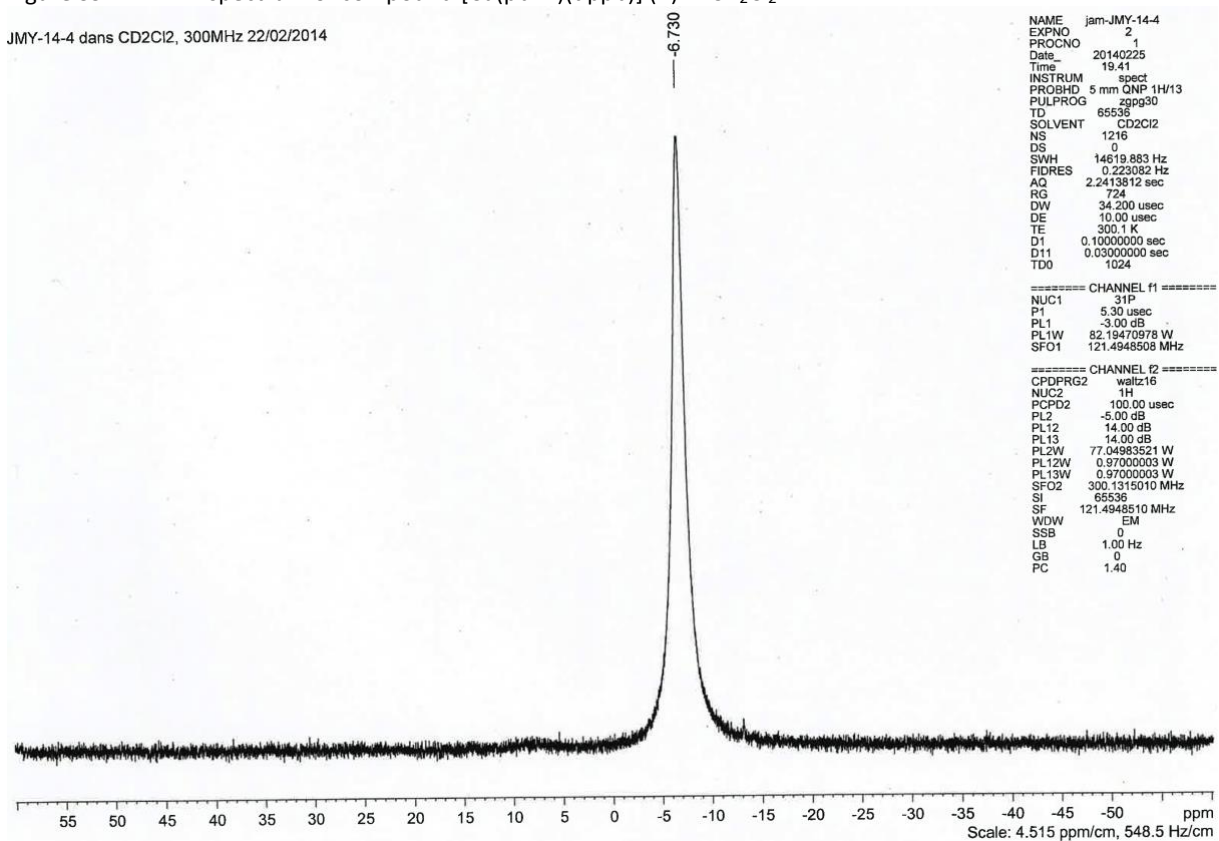

Figure S10:  $^{31}\text{P}$ -NMR spectrum of compound  $[\text{Cu}(\text{pbim})(\text{dppb})]$  (**4**) in  $\text{CD}_2\text{Cl}_2$

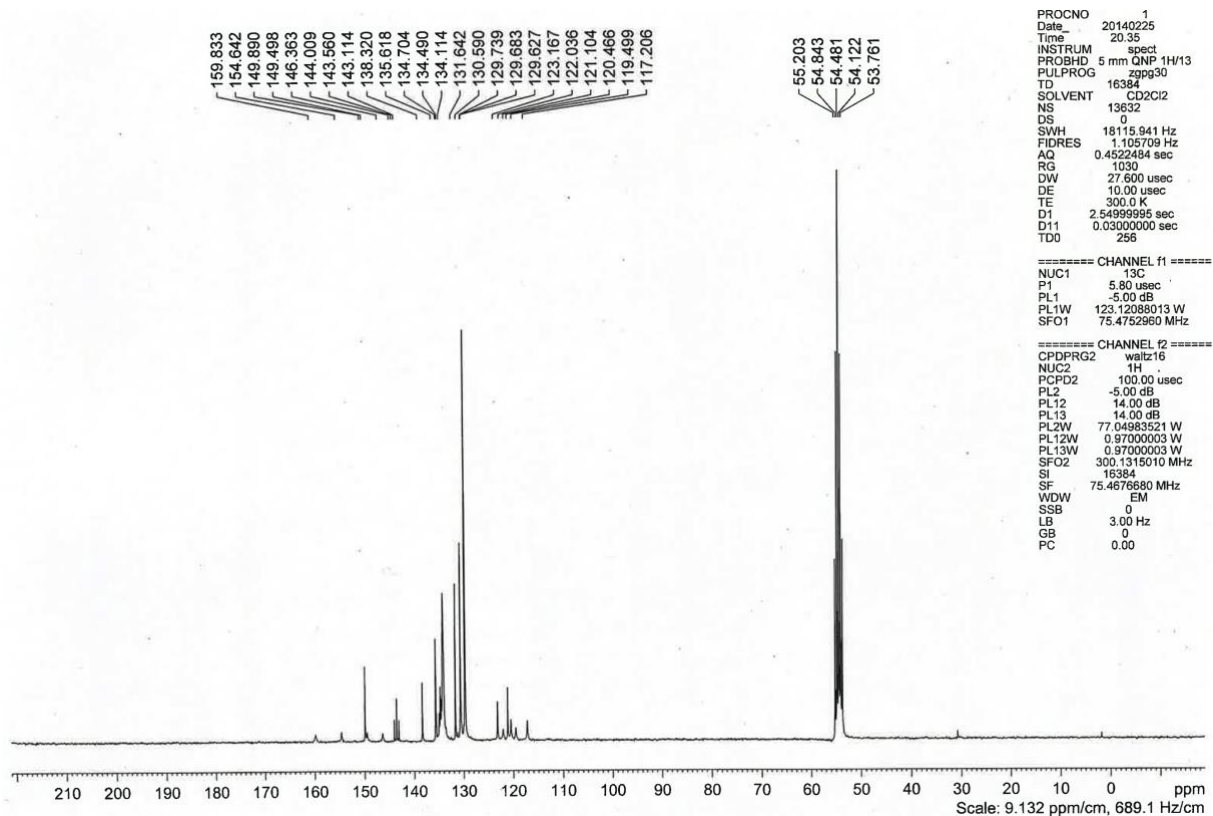

Figure S11:  $^{13}\text{C}$ -NMR spectrum of compound  $[\text{Cu}(\text{pbim})(\text{dppb})]$  (**4**) in  $\text{CD}_2\text{Cl}_2$

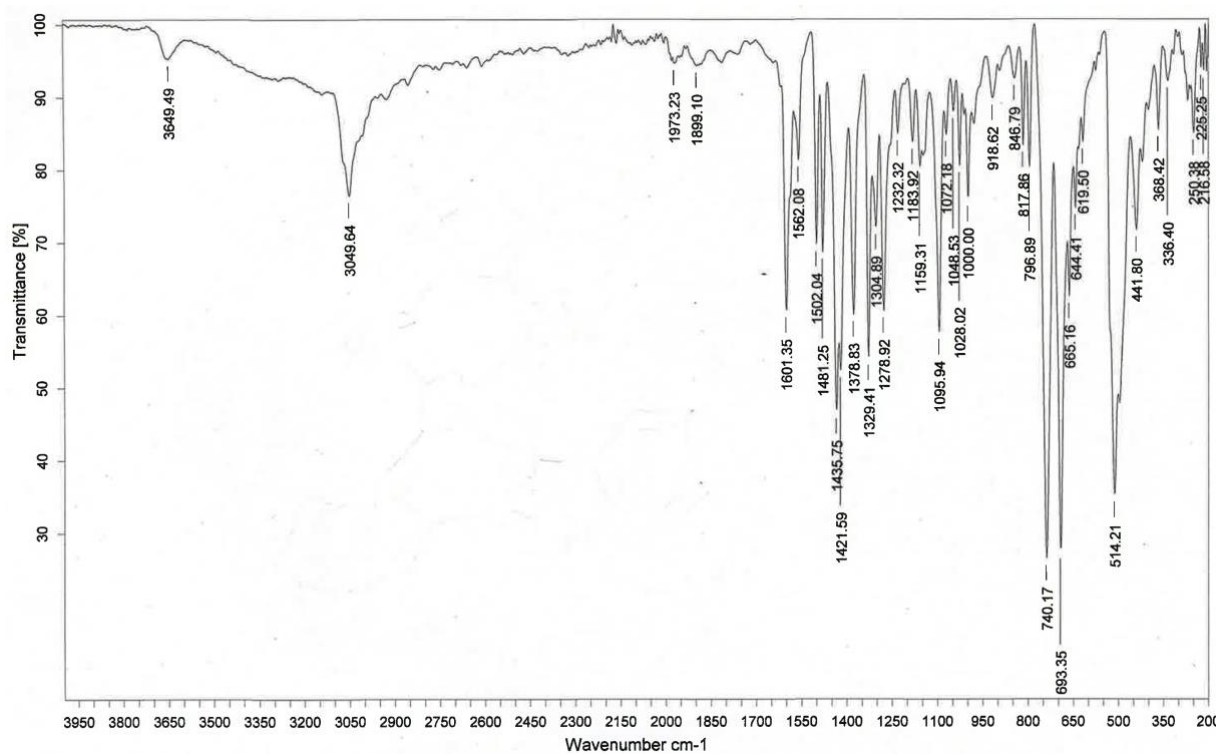

Figure S12: ATR-Infrared spectrum of compound  $[\text{Cu}(\text{pbim})(\text{dppb})]$  (**4**)
